# Supplementary material for: Encapsulation of anticancer drug by hydrogen-bonded multilayers of tannic acid
Source: Royal Society of Chemistry journal article supplement (doi:10.1039/c4sm01813c), 2014-01-01
Supplement: c4sm01813c1.pdf [file c4sm01813c1.pdf]

## Supporting Information

### Encapsulation of anticancer drug by hydrogen-bonded multilayers of tannic acid

Fei Liu,<sup>1</sup> ‡ Veronika Kozlovskaya,<sup>1</sup> ‡ Oleksandra Zavgorodnya,<sup>1</sup> Claudia Martinez-Lopez,<sup>1</sup> Shane Catledge,<sup>2,3</sup> and Eugenia Kharlampieva<sup>1,3\*</sup>

<sup>1</sup>Department of Chemistry,<sup>2</sup> Department of Physics, University of Alabama at Birmingham, Birmingham, AL, 35294, USA

<sup>3</sup>Center for Nanoscale Materials and Biointegration, University of Alabama at Birmingham, Birmingham, AL, 35294, USA

\*Correspondence address: 901 14<sup>th</sup> St South, CHEM294, Birmingham, AL, USA, 35294, e-mail: ekharlam@uab.edu

‡The authors equally contributed to this work

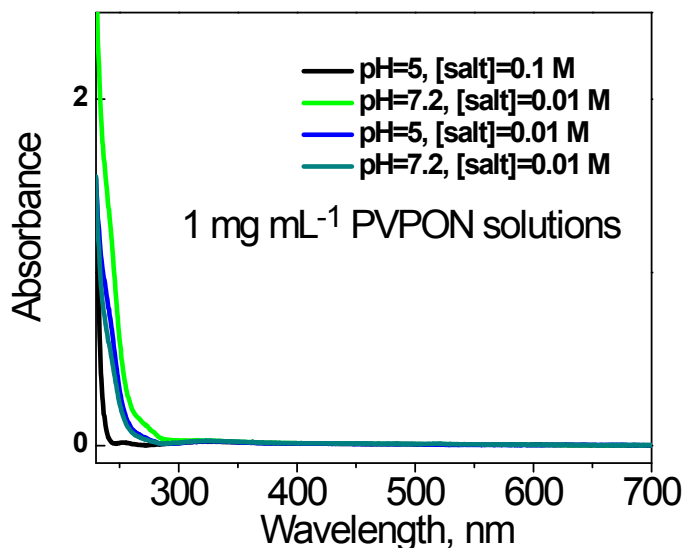

**Figure S1.** Absorption spectra of 1 mg mL<sup>-1</sup> PVPON solutions at pH=5 (0.1 and 0.01 M salt solutions) and at pH=7.4 (0.1 and 0.01 M salt solutions).

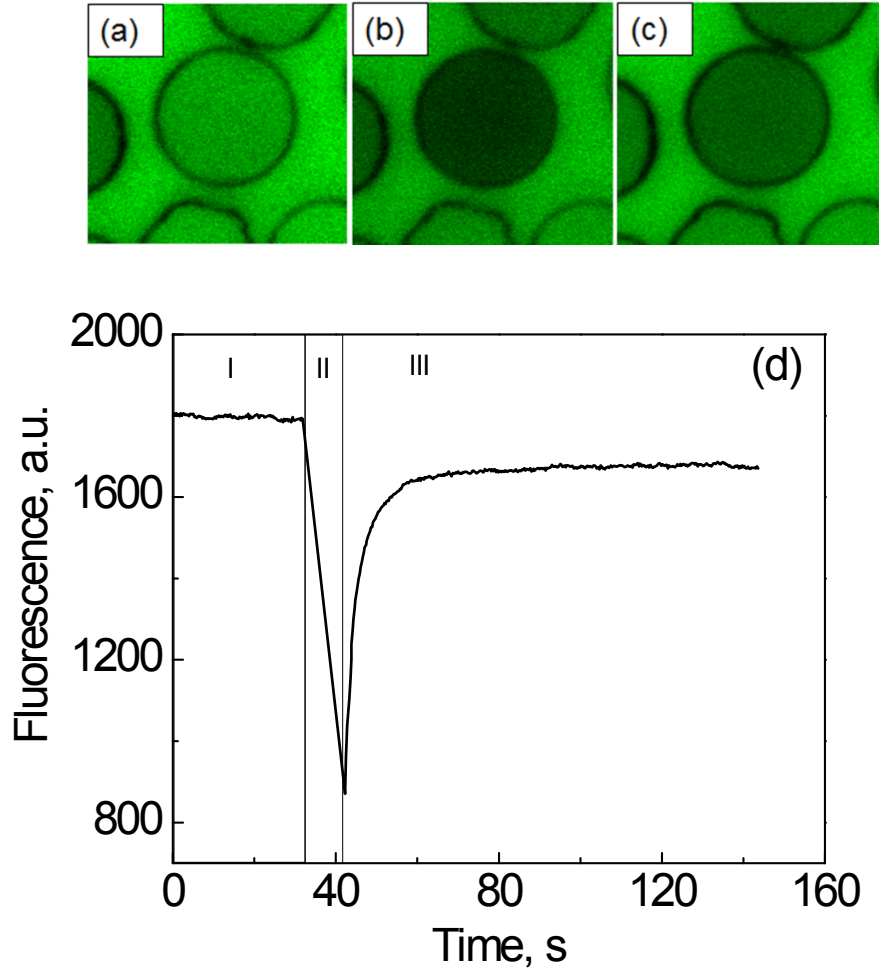

**Figure S2.** Confocal microscopy images of PEI(TA/PVPON)<sub>8</sub> capsules at pH=7.2 in the presence of FITC solution (a) before photo-bleaching, (b) right after photobleaching the capsule interior region with a 488 nm laser beam at 100% intensity, and (c) after fluorescence recovery. (d) A typical fluorescence recovery curve obtained for 8-bilayer PEI(TA/PVPON) hollow capsules prepared at pH=7.2. In region I, at low excitation intensity, the equal emission from the exterior and interior of a capsule is observed (a). In region II, at the increased excitation intensity, the FITC dye is photo-bleached in the illumination area. In the capsule exterior fast diffusion of FITC results in the unaffected fluorescence, while the interior of the capsule is dark as the non-bleached FITC slowly penetrates through the capsule wall (b). In region III, when the excitation intensity is decreased again, the fluorescence recovery after photo-bleaching is observed inside the capsule with time (c).
